# Supplementary material for: A microfluidic 3D hepatocyte chip for drug toxicity testing
Source: Royal Society of Chemistry journal article supplement (doi:10.1039/b900912d), 2009-01-01
Supplement: b900912d_table.pdf [file b900912d_table.pdf]

| <b>Drug</b>          | <b>IC<sub>50</sub> from 3D HepaTox Chip (mM)</b> | <b>IC<sub>50</sub> from literature (mM)</b>                       |
|----------------------|--------------------------------------------------|-------------------------------------------------------------------|
| Acetaminophen (APAP) | 16.90                                            | 14.01 <sup>29</sup><br>10.24 <sup>30</sup><br>20.42 <sup>31</sup> |
| Diclofenac           | 0.31                                             | 0.33 <sup>12</sup><br>0.26 <sup>29</sup><br>0.70 <sup>30</sup>    |
| Quinidine            | 0.31                                             | 0.24 <sup>29</sup><br>0.46 <sup>31</sup>                          |
| Ketoconazole         | 0.46                                             | 0.62 <sup>29</sup><br>0.11 <sup>30</sup>                          |
| Rifampin             | 1.77                                             | 1.4 <sup>36</sup>                                                 |

**Supplementary Table 1.** Comparison of IC<sub>50</sub> values calculated from the 3D HepaTox Chip and reported IC<sub>50</sub> values from literature.
